# Supplementary material
Source: PubMed Central journal article supplement (PMC2171035)
Supplement: NIHMS35804-supplement-01.pdf [file NIHMS35804-supplement-01.pdf]

## SUPPLEMENTARY FINDINGS

**Supplementary Table 1: Multinomial logistic regression results combining functional limitation and disability into a single measure**

|                               | Model 1                           |                        | Model 2                           |                        |
|-------------------------------|-----------------------------------|------------------------|-----------------------------------|------------------------|
|                               | Functional Limitation Vs. Neither | Disability Vs. Neither | Functional Limitation Vs. Neither | Disability Vs. Neither |
| Quintiles                     |                                   |                        |                                   |                        |
| - Lowest                      | 1.00                              | 1.00                   | 1.00                              | 1.00                   |
| - Second                      | 0.61 (.10)                        | 0.54 (.04)             | 0.59 (.26)                        | 0.52 (.02)             |
| - Third                       | 0.49 (.00)                        | 0.31 (.00)             | 0.46 (.01)                        | 0.29 (.00)             |
| - Fourth                      | 0.34 (.00)                        | 0.43 (.01)             | 0.32 (.01)                        | 0.39 (.00)             |
| - Highest                     | 0.50 (.02)                        | 0.61 (.15)             | 0.41 (.02)                        | 0.48 (.06)             |
| Age                           |                                   |                        |                                   |                        |
| - 60-64                       | 1.00                              | 1.00                   | 1.00                              | 1.00                   |
| - 65-69                       | 2.05 (.00)                        | 2.83 (.00)             | 1.89 (.00)                        | 2.56 (.00)             |
| - 70-74                       | 4.25 (.00)                        | 6.62 (.00)             | 3.74 (.00)                        | 5.54 (.00)             |
| - 75+                         | 8.28 (.00)                        | 12.85 (.00)            | 7.52 (.00)                        | 10.72 (.00)            |
| Female                        | 3.63 (.00)                        | 2.63 (.00)             | 4.68 (.00)                        | 3.02 (.00)             |
| In agriculture Household size |                                   |                        | 1.08 (.70)                        | 0.96 (.86)             |
| Worked                        |                                   |                        | 0.42 (.00)                        | 0.43 (.00)             |
| Married                       |                                   |                        | 0.98 (.92)                        | 0.83 (.50)             |
| Has schooling                 |                                   |                        | 2.01 (.00)                        | 1.86 (.06)             |
| L                             | -962.3                            |                        | -940.2                            |                        |
| $\Delta -2 X LL^a$            | 26.1 (.00)                        |                        | 26.2 (.00)                        |                        |

a Change in  $-2 X$  Log-likelihood when adding wealth to a models containing other variables
